# Supplementary material for: Surface analysis using shell-isolated nanoparticle-enhanced Raman spectroscopy
Source: Springer Nature journal article supplement (doi:10.1038/nprot.2012.141), 2012-12-13
Supplement: nprot.2012.141-S1.pdf [file nprot.2012.141-S1.pdf]

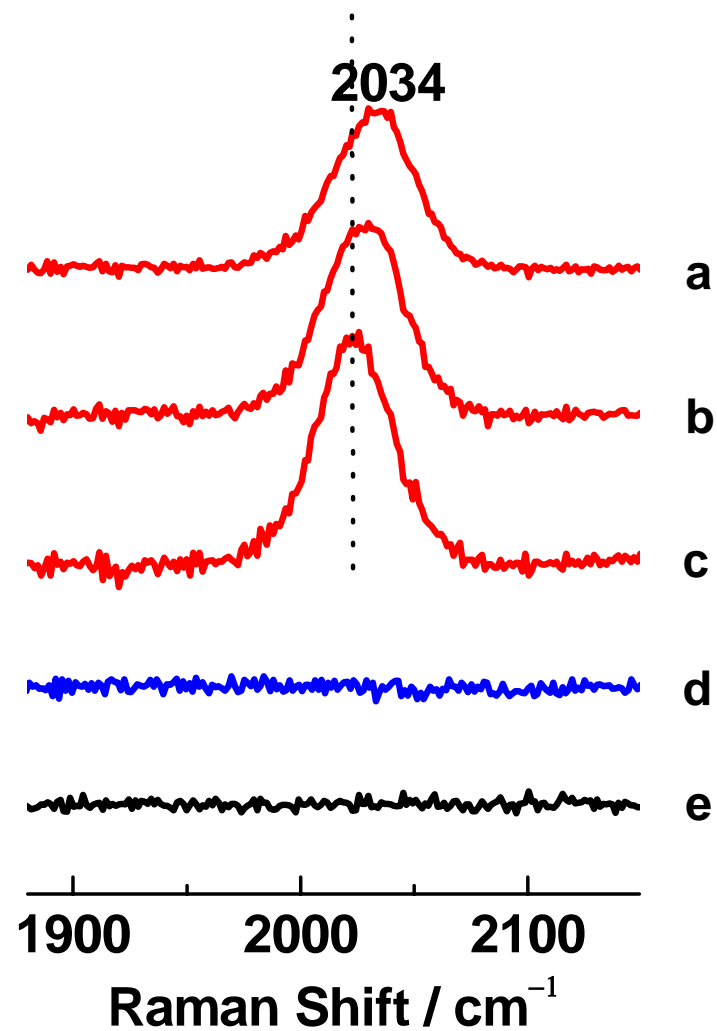

**Supplementary Figure 1** | Detection of hydrogen adsorption on Pt single-crystal surface. SHINERS spectra of hydrogen adsorbed on Pt(111) at  $-1.2$  V **(a)**, at  $-1.6$  V **(b)**, at  $-1.9$  V **(c)**, without Au@SiO<sub>2</sub> NPs at  $-1.9$  V **(d)**, and with the thicker-shell NPs at  $-1.9$  V **(e)**.
