# Supplementary material for: Surface analysis using shell-isolated nanoparticle-enhanced Raman spectroscopy
Source: Springer Nature journal article supplement (doi:10.1038/nprot.2012.141), 2012-12-13
Supplement: nprot.2012.141-S5.pdf [file nprot.2012.141-S5.pdf]

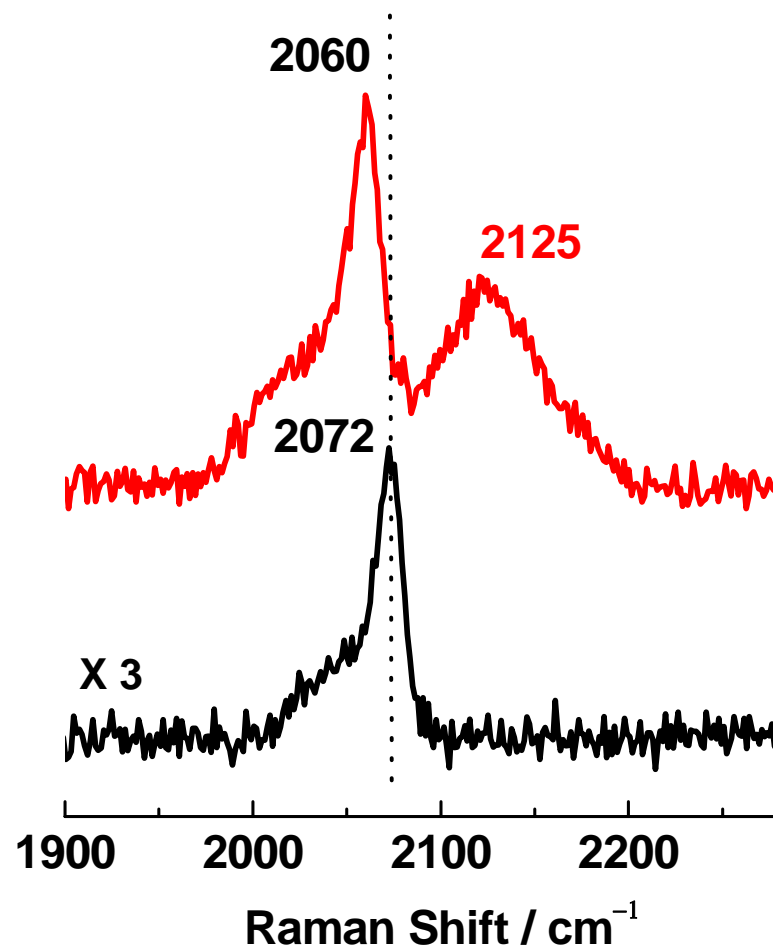

**Supplementary Figure 5** | SERS or SHINERS study of CO adsorbed on Pt single-crystal surface. The SERS spectrum of CO on Pt(111) at 0.0 V using bare Au NPs (top), and the SHINERS spectrum of CO on Pt(111) at 0.0 V using Au@SiO<sub>2</sub> NPs (bottom).
